# Supplementary material for: Transparent anhydride–cured epoxy nanocomposites reinforced with polyaniline stabilized nanosilica
Source: Royal Society of Chemistry journal article supplement (doi:10.1039/c5tc01392e), 2015-01-01
Supplement: c5tc01392e1.pdf [file c5tc01392e1.pdf]

Supporting Materials for

**Transparent anhydride-cured epoxy nanocomposites reinforced with  
polyaniline stabilized nanosilica**

Hongbo Gu,<sup>a,\*</sup> Jiang Guo,<sup>b</sup> Huige Wei,<sup>c</sup> Xingru Yan,<sup>b</sup> Daowei Ding,<sup>b</sup> Xi Zhang,<sup>c</sup> Qingliang He,<sup>b</sup>  
Sruthi Tadakamalla,<sup>c</sup> Xuefeng Wang,<sup>a</sup> Thomas C. Ho,<sup>c</sup> Suying Wei<sup>c,\*</sup> and Zhanhu Guo<sup>b,c,\*</sup>

<sup>a</sup>Shanghai Key Lab of Chemical Assessment and Sustainability, Department of Chemistry,  
Tongji University, Shanghai 200092, People's Republic of China

<sup>b</sup>Integrated Composites Laboratory (ICL),  
Department of Chemical & Biomolecular Engineering,  
University of Tennessee, Knoxville, Tennessee, 37966, USA

<sup>c</sup>Department of Chemistry & Biochemistry and  
Dan F. Smith Department of Chemical Engineering,  
Lamar University, Beaumont, Texas, 77710, USA

\*Corresponding author:

E-mail: [hongbogu2014@tongji.edu.cn](mailto:hongbogu2014@tongji.edu.cn) (H. G.),  
[zguo10@utk.edu](mailto:zguo10@utk.edu) (Z. G.),  
[suying.wei@lamar.edu](mailto:suying.wei@lamar.edu) (S. W.)

## S. 1 Chemical Structure Characterization of the Functionalized NanoSilica

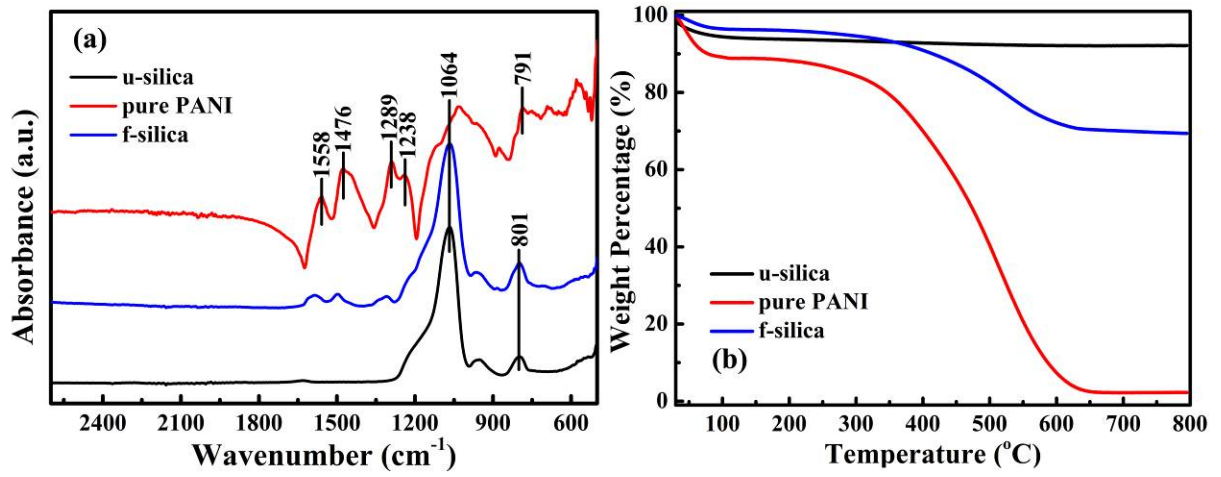

Fig. S1. (a) FT-IR spectra, and (b) TGA (air condition) of u-silica, pure PANI, and f-silica.

## S. 2 Viscosity of DER 331 Resin NanoSuspension with PANI Nanoparticles

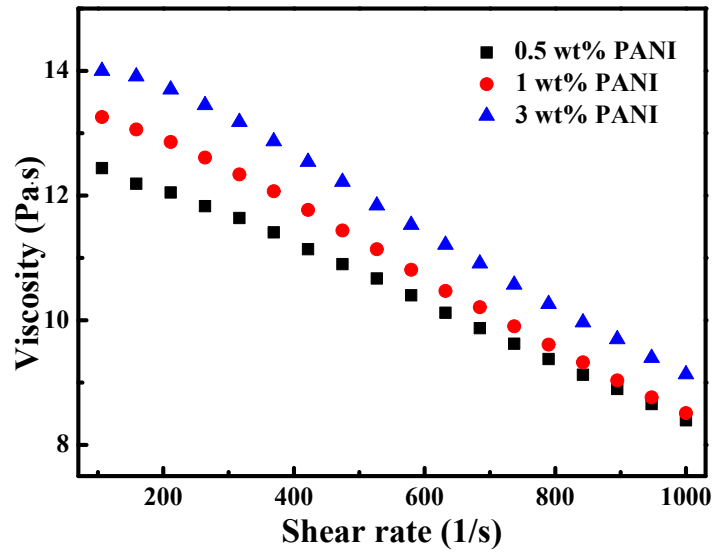

Fig. S2. Viscosity vs. shear rate of the epoxy resin nanosuspensions filled with different loadings of PANI nanoparticles at 25 °C.

### S. 3 Temperature Dependent Viscosity of DER 331 Resin Monomer

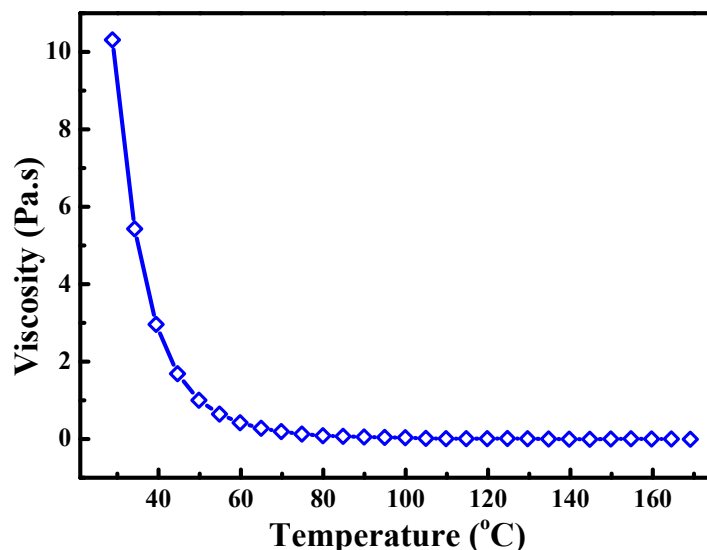

Fig. S3 Viscosity vs. Temperature of DER 331 resin monomer.

### S. 4 Comparison of Curing Process

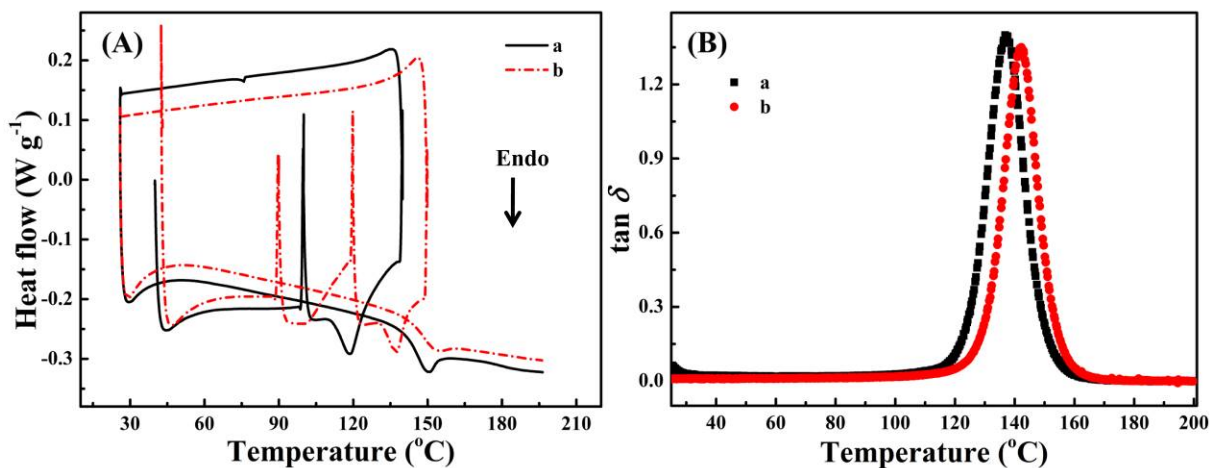

Fig. S4. For curing: (A) DSC curves; and (B)  $\tan \delta$  vs. temperature of (a) at 100 °C ~ 3 h, and 140 °C ~ 6 h; and (b) at 90 °C ~ 2 h, 120 °C ~ 2 h, and 150 °C ~ 5 h.

The DSC measurements of (a) process were carried out under a nitrogen flow rate of approximately 20 mL min<sup>-1</sup> at a heating rate of 10 °C min<sup>-1</sup> from 25 to 100 °C; and an isothermal process at 100 °C was continued for 180 min. Then the temperature was increased to 140 °C at a

heating rate of  $10\text{ }^{\circ}\text{C min}^{-1}$  and an isothermal process was conducted at  $140\text{ }^{\circ}\text{C}$  for 360 min. After that, the temperature was decreased to  $25\text{ }^{\circ}\text{C}$  at a rate of  $10\text{ }^{\circ}\text{C min}^{-1}$  and then the temperature was increased from 25 to  $200\text{ }^{\circ}\text{C}$  at a heating rate of  $10\text{ }^{\circ}\text{C min}^{-1}$ .

The DSC tests of **(b)** process were obtained under a nitrogen flow rate of approximately  $20\text{ mL min}^{-1}$  at a heating rate of  $10\text{ }^{\circ}\text{C min}^{-1}$  from 25 to  $90\text{ }^{\circ}\text{C}$ , and an isothermal process at  $90\text{ }^{\circ}\text{C}$  was continued for 120 min. Then the temperature was increased to  $120\text{ }^{\circ}\text{C}$  at a heating rate of  $10\text{ }^{\circ}\text{C min}^{-1}$  and an isothermal process was conducted at  $120\text{ }^{\circ}\text{C}$  for 120 min. After that, the temperature was increased to  $150\text{ }^{\circ}\text{C}$  at a heating rate of  $10\text{ }^{\circ}\text{C min}^{-1}$  and an isothermal process was conducted at  $150\text{ }^{\circ}\text{C}$  for 240 min. Finally, the temperature was decreased to  $25\text{ }^{\circ}\text{C}$  at a rate of  $10\text{ }^{\circ}\text{C min}^{-1}$  and then the temperature was increased to  $200\text{ }^{\circ}\text{C}$  at a heating rate of  $10\text{ }^{\circ}\text{C min}^{-1}$ .

## S. 5 Thermogravimetric Analysis (TGA)

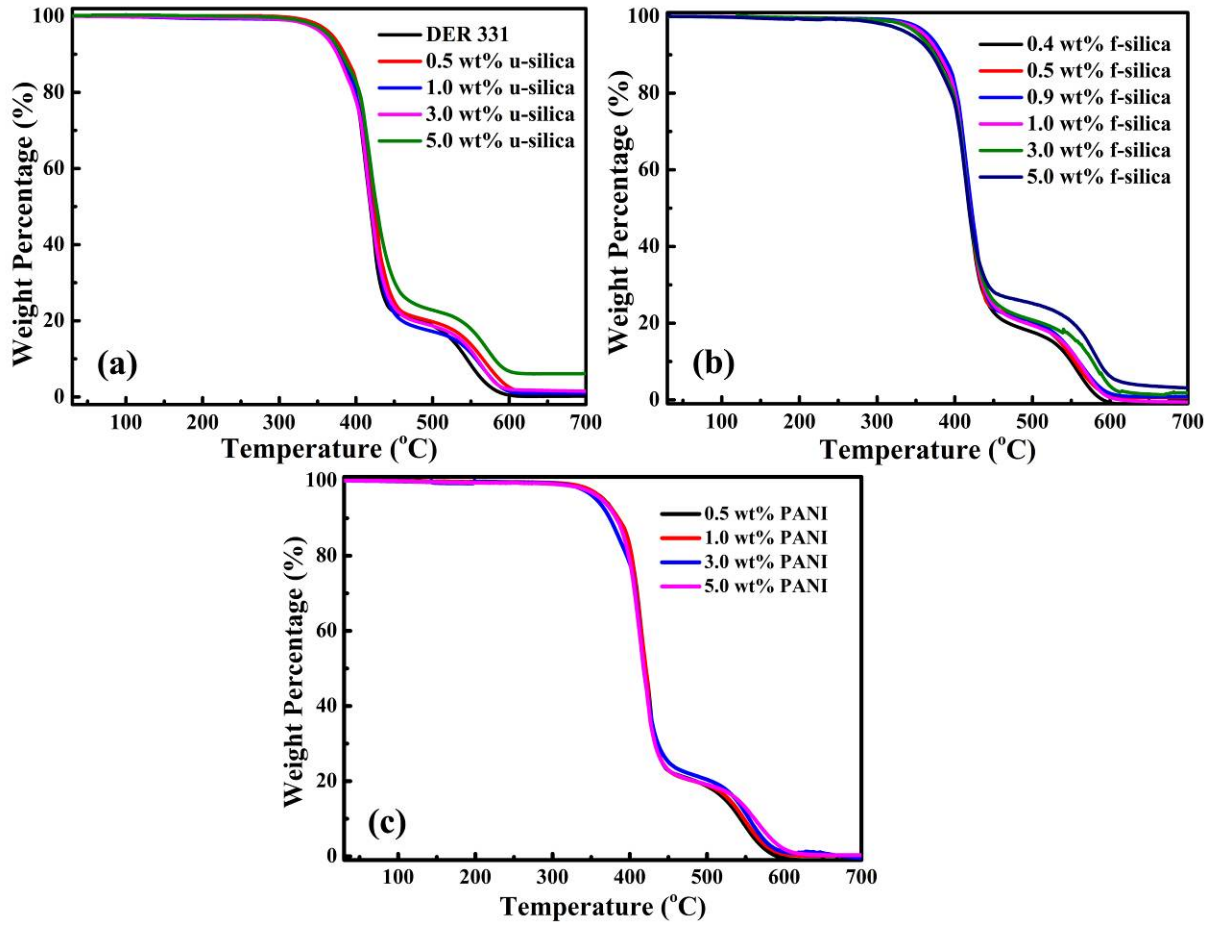

Fig. S5. TGA curves of (a) cured DER 331 resin and its nanocomposites with different u-silica loadings and (b) nanocomposites filled with different f-silica loadings (c) nanocomposites with different loadings of PANI nanoparticles.

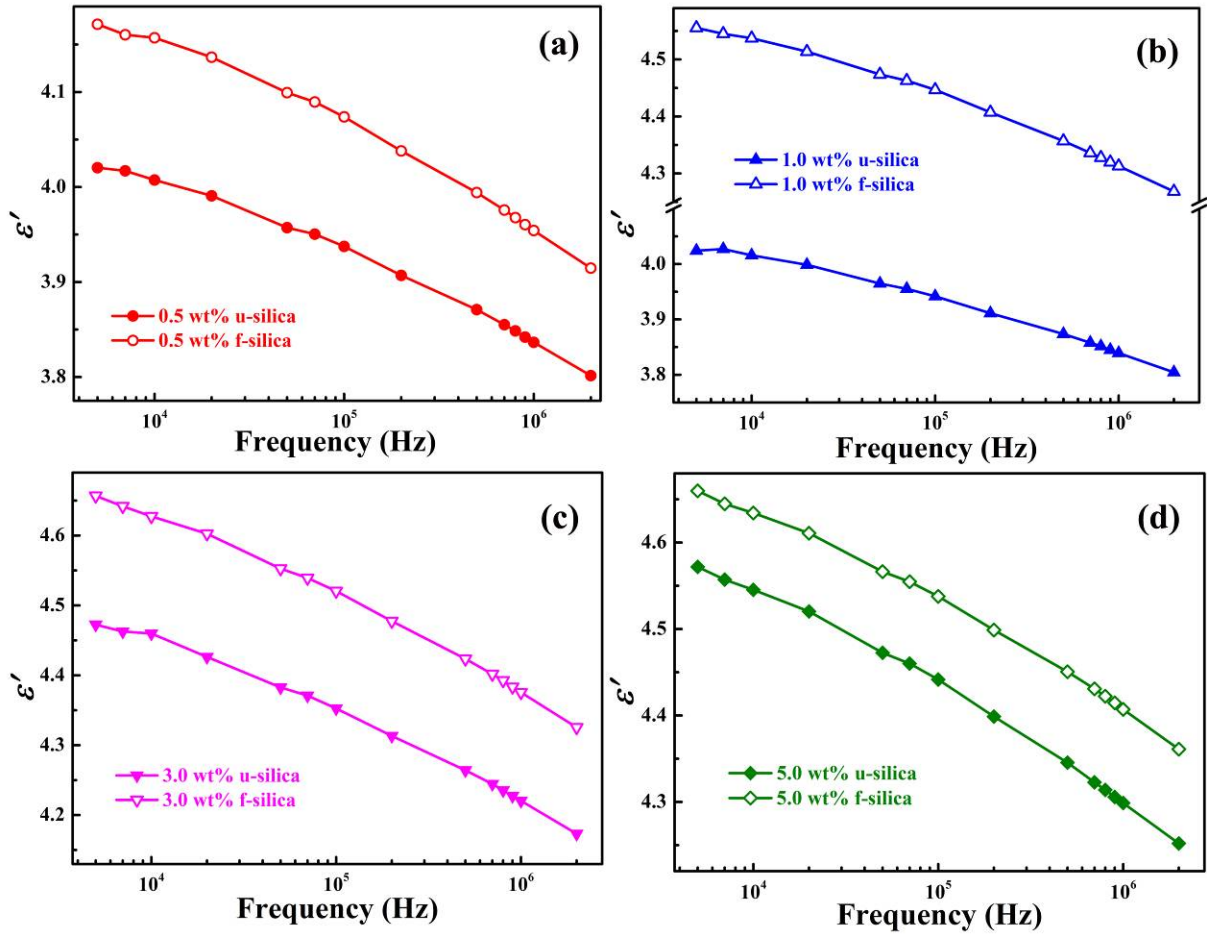

Fig. S6. Effect of surface treatment on the real permittivity ( $\epsilon'$ ) for the cured DER 331 nanocomposites filled with different silica loadings.

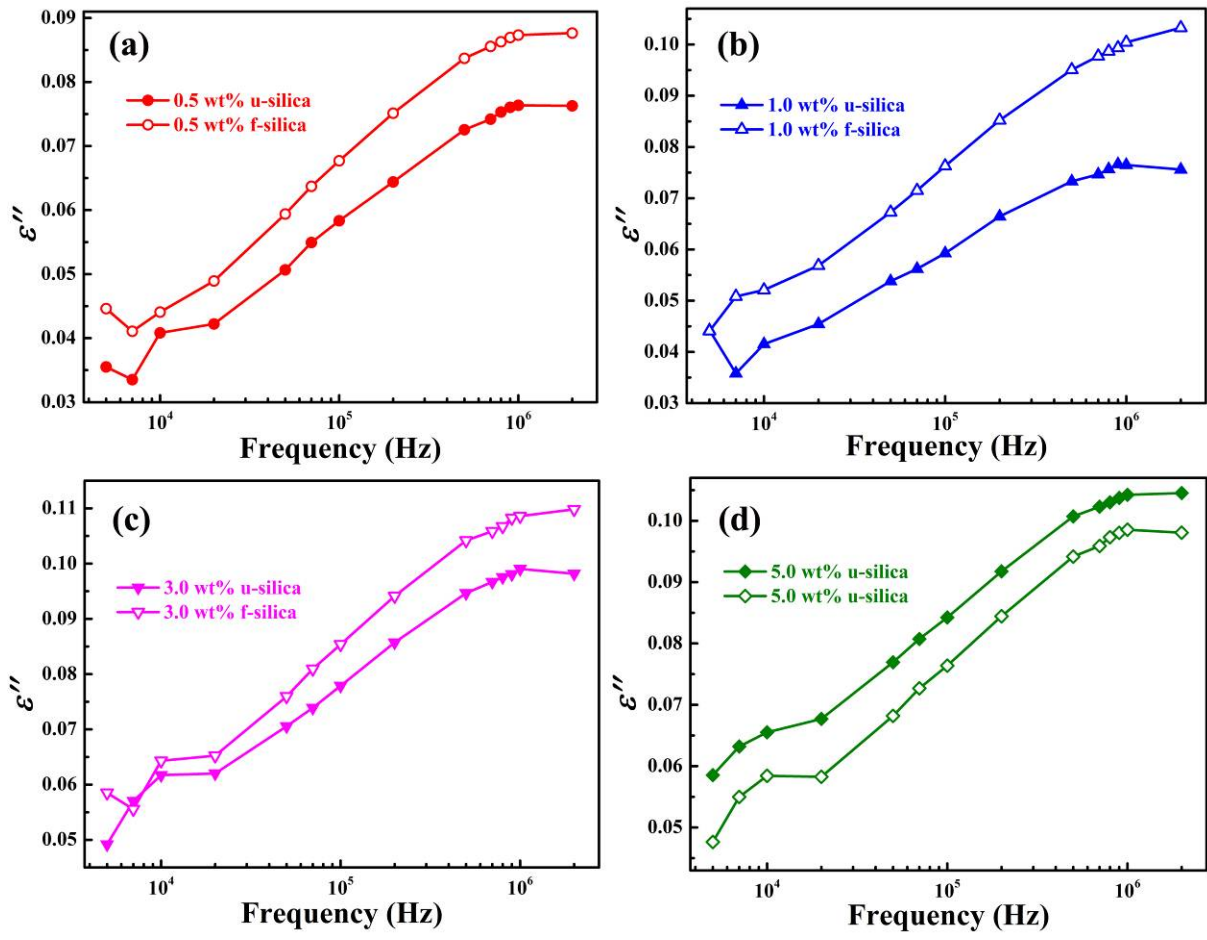

Fig. S7. Effect of surface treatment on the imaginary permittivity ( $\epsilon''$ ) for the cured DER 331 nanocomposites filled with different silica loadings.

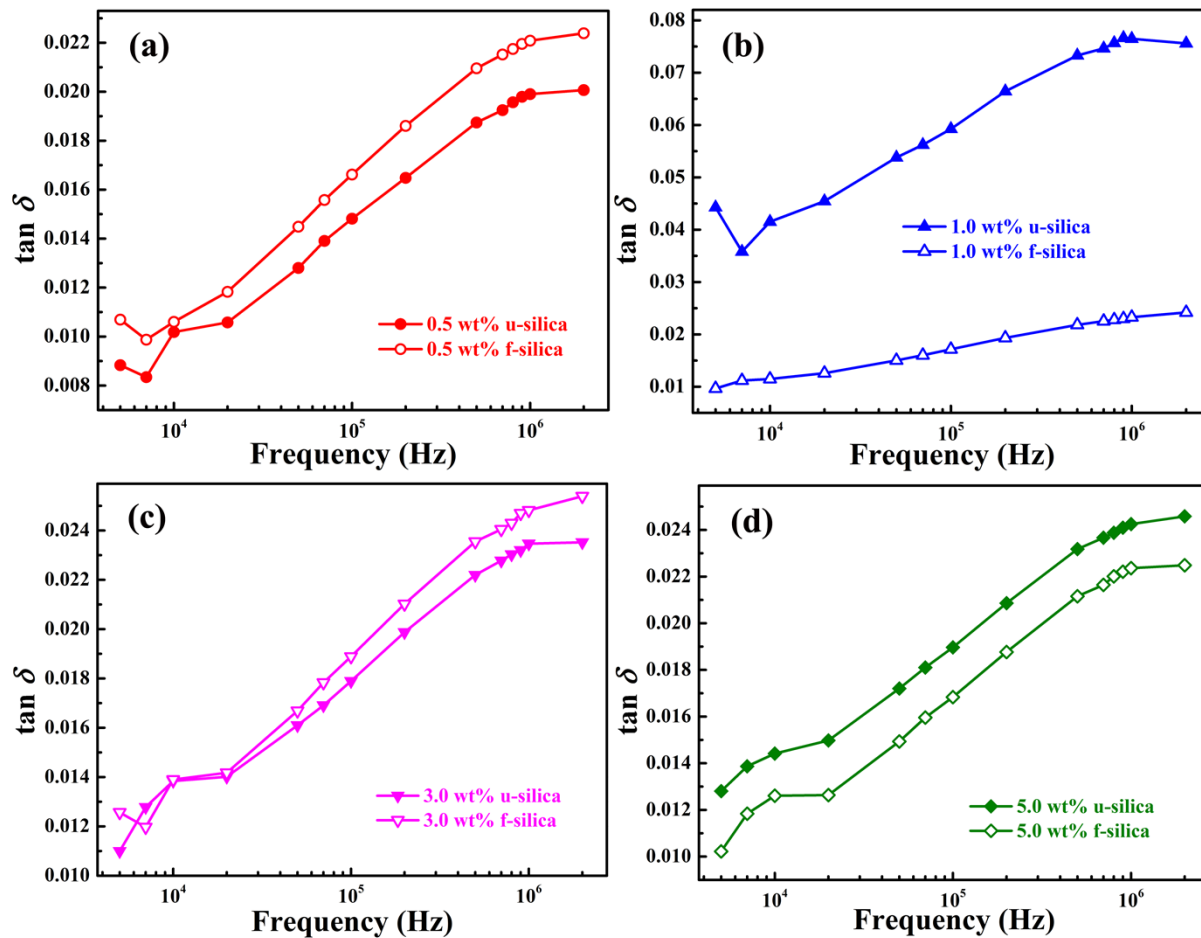

Fig. S8. Effect of surface treatment on the  $\tan \delta$  for the cured DER 331 nanocomposites filled with different silica loadings.



## S.6 Transparent Tests for DER 331 Nanocomposites Filled with PANI Nanoparticles

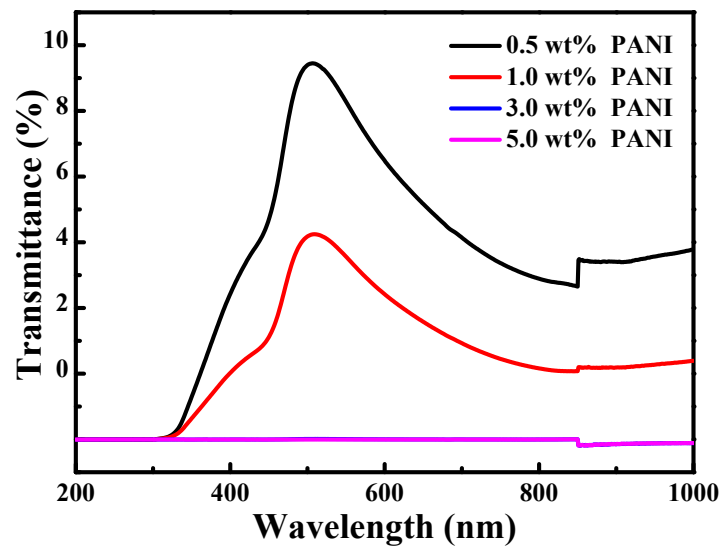

Fig. S6. Transmittance curves of the cured DER 331 resin filled with different PANI nanoparticles.
